# Supplementary material for: Investigating NAC Transcription Factor Role in Redox Homeostasis in Solanum lycopersicum L.: Bioinformatics, Physiological and Expression Analysis under Drought Stress
Source: MDPI journal article supplement (doi:10.3390/plants11212930), 2022-10-31
Supplement: s1 [file s1]

**Authors:**

Nagendra Rai<sup>a</sup>, Krishna Kumar Rai<sup>a,b</sup>, Manish Kumar Singh<sup>a</sup>, Jagdish Singh<sup>a</sup> and Prashant Kaushik<sup>c\*</sup>

**Article Title:**

**Investigating NAC transcription factor role in redox homeostasis in *Solanum lycopersicum* L.: Bioinformatics, physiological and expression analysis under drought stress**

**Affiliation**

<sup>1</sup> Indian Institute of Vegetable Research (ICAR-IIVR), Post Box-01, P.O.-Jakhini (Shahanshahpur), Varanasi-221305 (Uttar Pradesh), India

<sup>2</sup> Department of Botany, Institute of Science, Banaras Hindu University, Varanasi, 221005, U.P. India

<sup>3</sup> Instituto de Conservación y Mejora de la Agrodiversidad Valenciana, Universitat Politècnica de València, 46022 Valencia, Spain

**Author for correspondence**

\* Email: [prakau@doctor.upv.es](mailto:prakau@doctor.upv.es);

## Supporting information's

### Protein family membership

None predicted.

### Homologous superfamilies

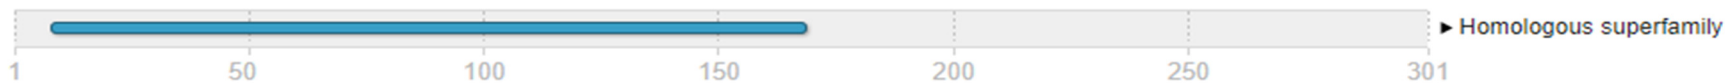

### Domains and repeats

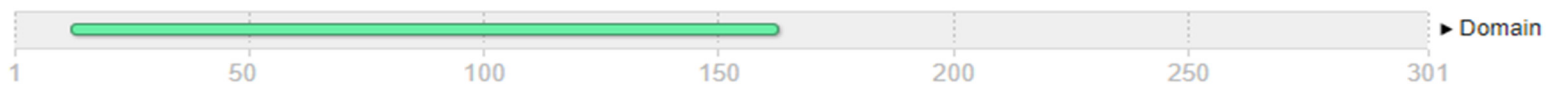

### Detailed signature matches

**H** IPR036093 NAC domain superfamily

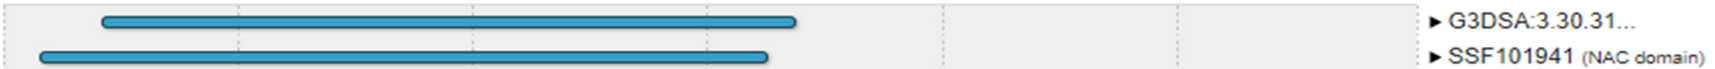

**D** IPR003441 NAC domain

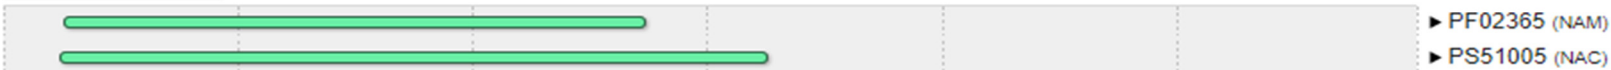

**?** no IPR Unintegrated signatures

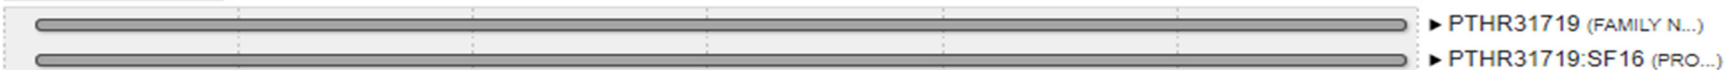

**Supporting Information Figure S1** Prediction of the location of NAC domain in SINAC1 protein using InterProScan scan analysis.

Your model for the target sequence  
**NAC**  
has been successfully deposited.

PDB: [SINAC.pdb](#)  
AUTHOR: [Krishna Kumar Rai, Nagendra Rai and Shashi Pandey Rai](#)  
SUBMITTER: [Rai Krishna](#)

It has been assigned  
the following PMDB id: **PM0082340**

Your model will be released 2019-11-1

**Supporting information Figure S2** Submission of our predicted model to PMDB and assigned PMDB ID (PM0081904) for our submitted structure

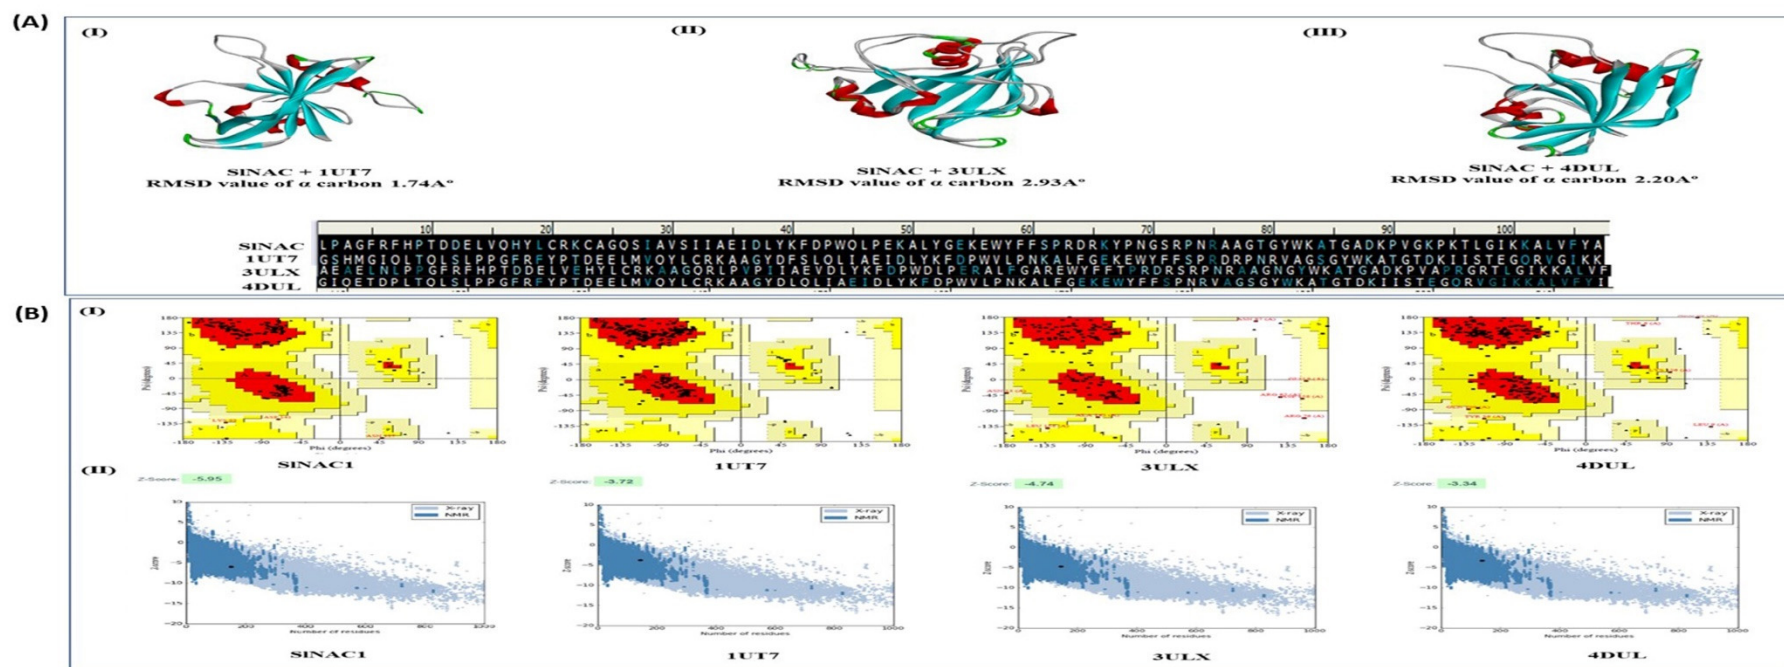

**Supporting Information Figure S3.** Superimposition results represented with their respective global and local RMSD-values showing the structural conservation of SINAC1 domain. Superimposition results revealed that SIDREB1 were found to be structurally closer to 1UT7 template compared to 4DUL, 3ULX templates as evident from their variations for RMSD values. Sequence alignment between SIDREB1 with the respective templates (1UT7, 4DUL, 3ULX) predicts the synonymous (blue) and non-synonymous substitutions (white) (B) Qualitative analysis of predicted model using PROCHECK and ProSA analysis. (i) The stereo chemical spatial arrangement of amino acid residues in predicted model (SIDREB1) were compared with experimentally resolved structures (1UT7, 4DUL, 3ULX) through PROCHECK server. Most favoured regions are coloured red while additionally, generously and disallowed regions are indicated with yellow, light yellow and white fields respectively. (ii) Qualitative estimation by ProSA server, that measures structural errors in each amino acid residues

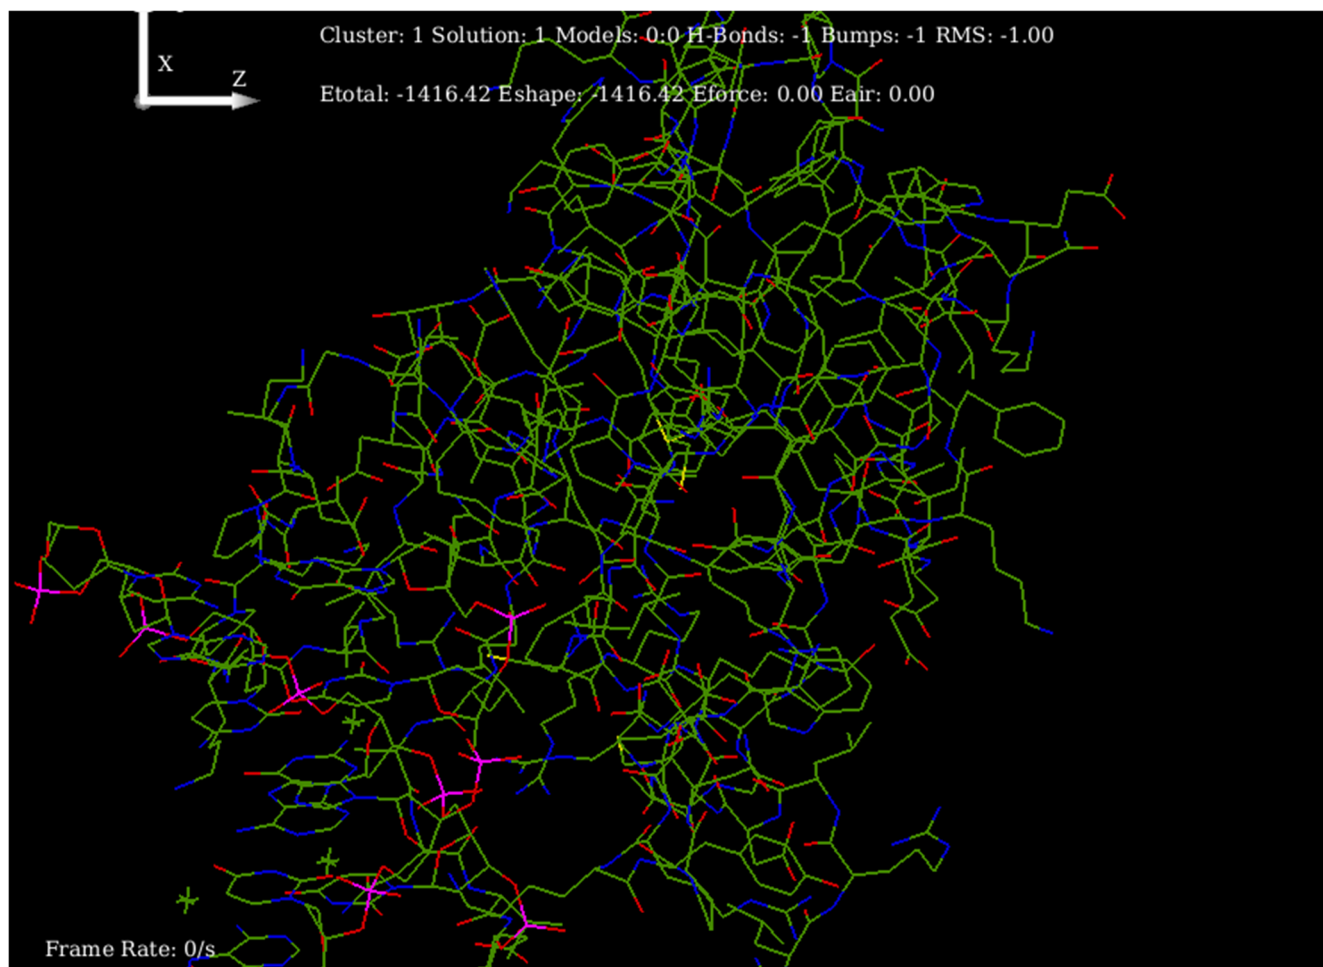

**Supporting information Figure S4** Binding energy of docked complex of SINAC1 protein with DNA element

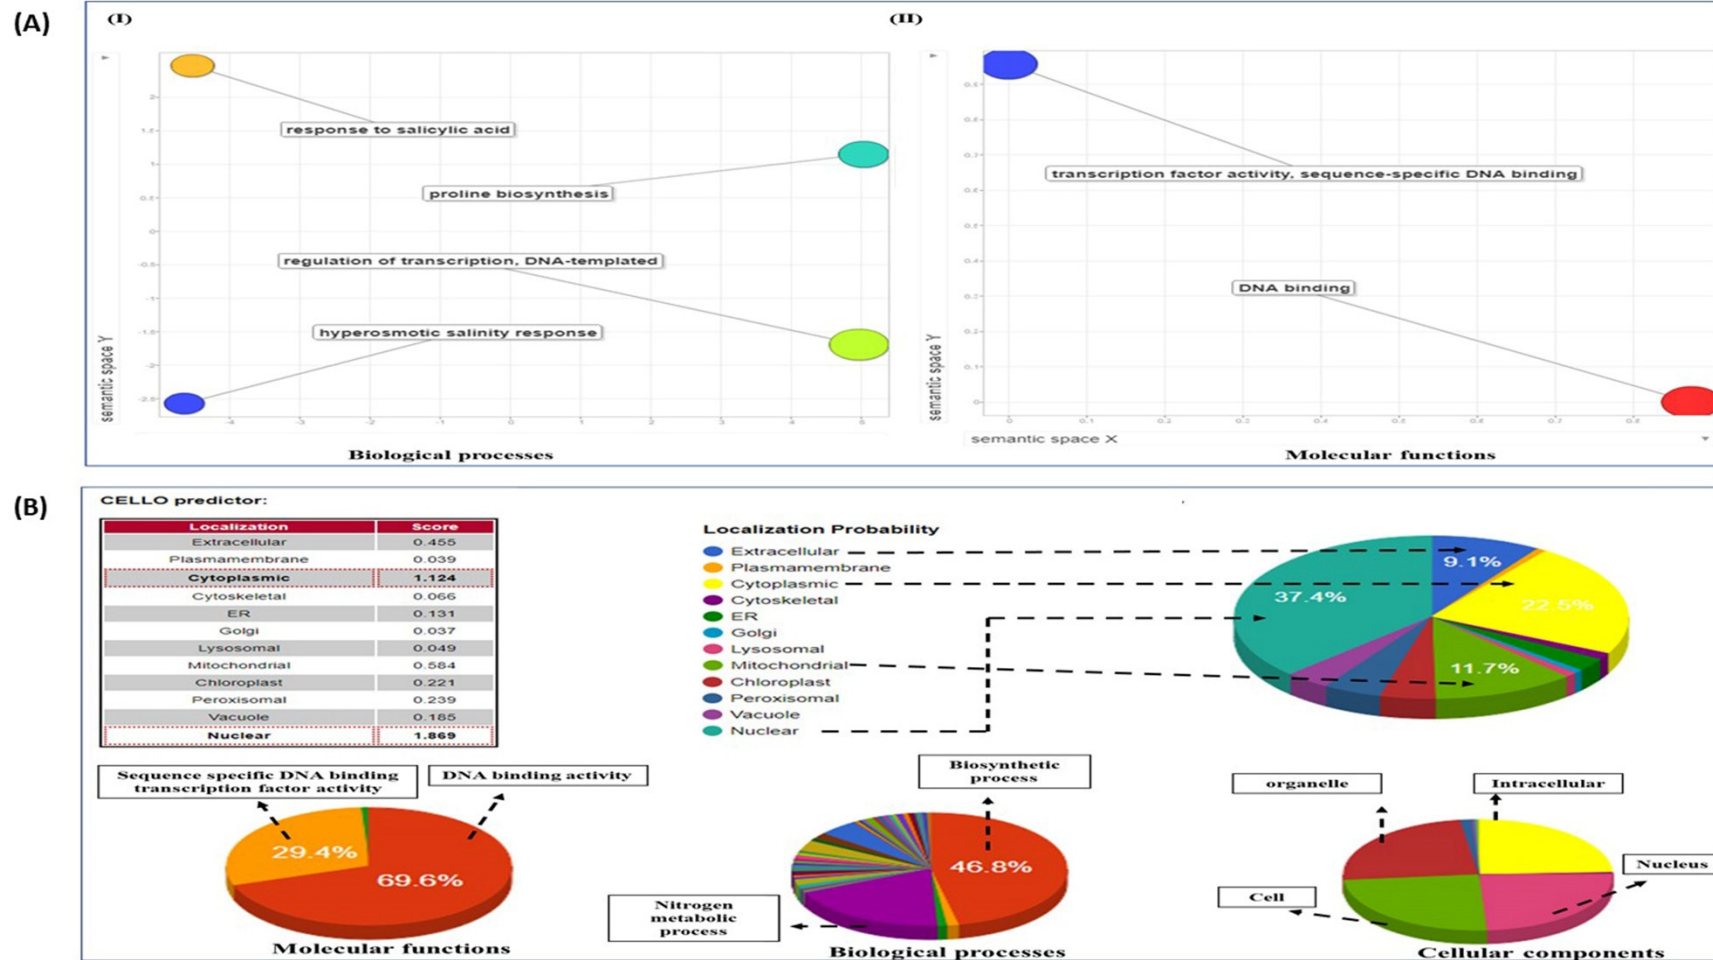

**Supporting information Figure S5** Gene ontology analysis using ReviGO web server. The functional and significant GO terms involved in (I) biological processes and (II) molecular function are shown on scattered plot diagram using hypergeometric test distribution of SINAC1. (B) The subcellular localization and functional gene annotation of SINAC1 using CELLO2GO web server. The significant terms are represented in terms of their percentage contribution

**Supporting Information Table S1** Functional annotation, accession ID and interacting score values for both first and second shell of interactors that form mutual interactive associative network along with SINAC. The higher value of score indicate the more frequent interaction exist between two associated proteins.

| <b><u>Node1</u></b> | <b><u>Node2</u></b> | <b><u>Node1 accession</u></b> | <b><u>Node2 accession</u></b> | <b><u>Node1 annotation</u></b> | <b><u>Node2 annotation</u></b>                                                                                                                                                                                                                                                                                                                                                                     | <b><u>Score</u></b> |
|---------------------|---------------------|-------------------------------|-------------------------------|--------------------------------|----------------------------------------------------------------------------------------------------------------------------------------------------------------------------------------------------------------------------------------------------------------------------------------------------------------------------------------------------------------------------------------------------|---------------------|
| 101248306           | 101256610           | Solyc06g076160.2.1            | Solyc08g007230.1.1            | annotation not available       | annotation not available                                                                                                                                                                                                                                                                                                                                                                           | 0.776               |
| 101248306           | ERF-1               | Solyc06g076160.2.1            | Solyc03g093610.1.1            | annotation not available       | Ethylene-responsive transcription factor 1; Involved in the regulation of gene expression during fruit ripening, by stress factors and by components of stress signal transduction pathways. Transcription factor that binds to the GCC-box pathogenesis-related promoter element. Probably acts as a transcriptional activator and may be involved in disease resistance pathways (By similarity) | 0.773               |
| 101248306           | LOC544041           | Solyc06g076160.2.1            | Solyc05g052050.1.1            | annotation not available       | Uncharacterized protein; Pti4                                                                                                                                                                                                                                                                                                                                                                      | 0.583               |
| 101248306           | NAC1                | Solyc06g076160.2.1            | Solyc04g009440.2.1            | annotation not available       | NAC domain protein; NAC domain protein 1                                                                                                                                                                                                                                                                                                                                                           | 0.776               |
| 101248306           | Solyc02g077820.1.1  | Solyc06g076160.2.1            | Solyc02g077820.1.1            | annotation not available       | annotation not available                                                                                                                                                                                                                                                                                                                                                                           | 0.776               |
| 101248306           | Solyc05g050280.2.1  | Solyc06g076160.2.1            | Solyc05g050280.2.1            | annotation not available       | annotation not available                                                                                                                                                                                                                                                                                                                                                                           | 0.699               |
| 101248306           | Solyc05g050290.1.1  | Solyc06g076160.2.1            | Solyc05g050290.1.1            | annotation not available       | annotation not available                                                                                                                                                                                                                                                                                                                                                                           | 0.699               |
| 101256610           | 101248306           | Solyc08g007230.1.1            | Solyc06g076160.2.1            | annotation not available       | annotation not available                                                                                                                                                                                                                                                                                                                                                                           | 0.776               |

|           |                    |                    |                    |                                                                                                                                                                                                                                                                                                                                                                                                    |                                          |       |
|-----------|--------------------|--------------------|--------------------|----------------------------------------------------------------------------------------------------------------------------------------------------------------------------------------------------------------------------------------------------------------------------------------------------------------------------------------------------------------------------------------------------|------------------------------------------|-------|
| 101256610 | NAC1               | Solyc08g007230.1.1 | Solyc04g009440.2.1 | annotation not available                                                                                                                                                                                                                                                                                                                                                                           | NAC domain protein; NAC domain protein 1 | 0.776 |
| 101256610 | Solyc02g077820.1.1 | Solyc08g007230.1.1 | Solyc02g077820.1.1 | annotation not available                                                                                                                                                                                                                                                                                                                                                                           | annotation not available                 | 0.78  |
| 101256610 | Solyc05g050280.2.1 | Solyc08g007230.1.1 | Solyc05g050280.2.1 | annotation not available                                                                                                                                                                                                                                                                                                                                                                           | annotation not available                 | 0.699 |
| 101256610 | Solyc05g050290.1.1 | Solyc08g007230.1.1 | Solyc05g050290.1.1 | annotation not available                                                                                                                                                                                                                                                                                                                                                                           | annotation not available                 | 0.699 |
| ERF-1     | 101248306          | Solyc03g093610.1.1 | Solyc06g076160.2.1 | Ethylene-responsive transcription factor 1; Involved in the regulation of gene expression during fruit ripening, by stress factors and by components of stress signal transduction pathways. Transcription factor that binds to the GCC-box pathogenesis-related promoter element. Probably acts as a transcriptional activator and may be involved in disease resistance pathways (By similarity) | annotation not available                 | 0.773 |
| ERF-1     | NAC1               | Solyc03g093610.1.1 | Solyc04g009440.2.1 | Ethylene-responsive transcription factor 1; Involved in the regulation of gene expression during fruit ripening, by stress factors and by components of stress signal transduction                                                                                                                                                                                                                 | NAC domain protein; NAC domain protein 1 | 0.777 |



|       |                    |                    |                    |                                                                                                                                                                                                                                                                                                                                                                                                       |                          |       |
|-------|--------------------|--------------------|--------------------|-------------------------------------------------------------------------------------------------------------------------------------------------------------------------------------------------------------------------------------------------------------------------------------------------------------------------------------------------------------------------------------------------------|--------------------------|-------|
|       |                    |                    |                    | pathways.<br>Transcription factor that binds to the GCC-box pathogenesis-related promoter element. Probably acts as a transcriptional activator and may be involved in disease resistance pathways (By similarity)                                                                                                                                                                                    |                          |       |
| ERF-1 | Solyc02g077820.1.1 | Solyc03g093610.1.1 | Solyc02g077820.1.1 | Ethylene-responsive transcription factor 1; Involved in the regulation of gene expression during fruit ripening, by stress factors and by components of stress signal transduction pathways.<br>Transcription factor that binds to the GCC-box pathogenesis-related promoter element. Probably acts as a transcriptional activator and may be involved in disease resistance pathways (By similarity) | annotation not available | 0.777 |
| ERF-1 | Solyc05g050280.2.1 | Solyc03g093610.1.1 | Solyc05g050280.2.1 | Ethylene-responsive transcription factor 1; Involved in the regulation of gene expression during fruit ripening, by                                                                                                                                                                                                                                                                                   | annotation not available | 0.697 |

|           |                    |                    |                    |                                                                                                                                                                                                                                                                                                                                                                                                       |                          |       |
|-----------|--------------------|--------------------|--------------------|-------------------------------------------------------------------------------------------------------------------------------------------------------------------------------------------------------------------------------------------------------------------------------------------------------------------------------------------------------------------------------------------------------|--------------------------|-------|
|           |                    |                    |                    | stress factors and by components of stress signal transduction pathways.<br>Transcription factor that binds to the GCC-box pathogenesis-related promoter element. Probably acts as a transcriptional activator and may be involved in disease resistance pathways (By similarity)                                                                                                                     |                          |       |
| ERF-1     | Solyc05g050290.1.1 | Solyc03g093610.1.1 | Solyc05g050290.1.1 | Ethylene-responsive transcription factor 1; Involved in the regulation of gene expression during fruit ripening, by stress factors and by components of stress signal transduction pathways.<br>Transcription factor that binds to the GCC-box pathogenesis-related promoter element. Probably acts as a transcriptional activator and may be involved in disease resistance pathways (By similarity) | annotation not available | 0.697 |
| LOC544041 | 101248306          | Solyc05g052050.1.1 | Solyc06g076160.2.1 | Uncharacterized protein; Pti4                                                                                                                                                                                                                                                                                                                                                                         | annotation not available | 0.583 |

|           |                    |                    |                    |                                          |                                                                                                                                                                                                                                                                                                                                                                                                    |       |
|-----------|--------------------|--------------------|--------------------|------------------------------------------|----------------------------------------------------------------------------------------------------------------------------------------------------------------------------------------------------------------------------------------------------------------------------------------------------------------------------------------------------------------------------------------------------|-------|
| LOC544041 | NAC1               | Solyc05g052050.1.1 | Solyc04g009440.2.1 | Uncharacterized protein; Pti4            | NAC domain protein; NAC domain protein 1                                                                                                                                                                                                                                                                                                                                                           | 0.603 |
| LOC544041 | Solyc02g077820.1.1 | Solyc05g052050.1.1 | Solyc02g077820.1.1 | Uncharacterized protein; Pti4            | annotation not available                                                                                                                                                                                                                                                                                                                                                                           | 0.551 |
| NAC1      | 101248306          | Solyc04g009440.2.1 | Solyc06g076160.2.1 | NAC domain protein; NAC domain protein 1 | annotation not available                                                                                                                                                                                                                                                                                                                                                                           | 0.776 |
| NAC1      | 101256610          | Solyc04g009440.2.1 | Solyc08g007230.1.1 | NAC domain protein; NAC domain protein 1 | annotation not available                                                                                                                                                                                                                                                                                                                                                                           | 0.776 |
| NAC1      | ERF-1              | Solyc04g009440.2.1 | Solyc03g093610.1.1 | NAC domain protein; NAC domain protein 1 | Ethylene-responsive transcription factor 1; Involved in the regulation of gene expression during fruit ripening, by stress factors and by components of stress signal transduction pathways. Transcription factor that binds to the GCC-box pathogenesis-related promoter element. Probably acts as a transcriptional activator and may be involved in disease resistance pathways (By similarity) | 0.777 |

**Supporting Information Table S2 Primers used for quantification of mRNA levels by qRT-PCR**

| <b>Gene bank<br/>(Accession number)</b> | <b>Gene</b>                         | <b>Forward (5'- 3')</b>  | <b>Reverse (5'- 3')</b> |
|-----------------------------------------|-------------------------------------|--------------------------|-------------------------|
| NM001247553.3                           | NAC1                                | CAAGTTTGATCCATGGCAGTTG   | CCGTGAACCGTTCGGATATT    |
| KC447280.1                              | NAC1.1                              | GACACCAGCAAACGACTACT     | CTGTGGTCTTCGTCCCATTT    |
| JZ714624                                | Heat shock protein                  | TTTTCAATATGGGTGCTGGTT    | CTGCCAAGGCTTTTATCTGG    |
| JZ714625                                | Zinc finger protein                 | CCACCGCTACTCCTTTCCT      | GCATGAAGATTGATCCATACGA  |
| GU591574.1                              | NAC2                                | ATCCGACAGACGACGAATTG     | AAAGTCGCCGCCGATTAG      |
| JZ714627                                | Late embryogenesis abundant protein | ACGAGTGGAGGAGTGGTGTC     | GCAACTGCCATGGATCAAAC    |
| AJ222579                                | Elongation factor 1 alpha           | GACAACATGATTGAGAGGTCCACC | GGCTCCTTCTCAATCTCCTTACC |
| NM001330119.1                           | Actin                               | GTGTCTGGATTGGAGGATCAATC  | GGCCACGCTCATCATATTCA    |
